# Supplementary material for: Use of health information technology to reduce diagnostic errors
Source: PubMed Central journal article supplement — BMJ Qual Saf. 2013 Jul 13;22(Suppl 2):ii40–51. doi: 10.1136/bmjqs-2013-001884 (PMC3786650; doi:10.1136/bmjqs-2013-001884), 2013-07-13
Supplement: bmjqs-2013-001884-s1.pdf [file bmjqs-2013-001884-s1.pdf]

Appendix

Table A1. Search logic for diagnostic clinical decision support studies

|                |                                                                                                                                                                                                                                                                                                                                                                  |
|----------------|------------------------------------------------------------------------------------------------------------------------------------------------------------------------------------------------------------------------------------------------------------------------------------------------------------------------------------------------------------------|
| Medline        | <p>((MeSH Major Topic=(((Decision Support Techniques) OR Decision Support Systems Clinical) OR Diagnosis Computer Assisted) OR Electronic Health Records) AND MeSH Major Topic:exp=(Diagnosis)) AND MeSH Heading=(Humans)) AND Title=(((detect*) OR diagnos*) OR identif*) OR test*) OR result*)</p> <p>Limits: Humans, English language, Year 2000 or later</p> |
| Web of Science | <p>(TI=(*diagnos* AND (*support* OR *system* OR *alert* OR *reminder*)) AND TS=(*decision*) AND TI=(detect* OR diagnos* OR identif* OR test* OR result*)) AND Language=(English)</p> <p>Databases=SCI-EXPANDED, SSCI, A&amp;HCI, Year 2000 or later, Lemmatization=On</p>                                                                                        |
